# Supplementary material for: Forcing mechanisms of the quarterdiurnal tide
Source: Copernicus journal article supplement (doi:10.5194/angeo-2019-145), 2019-10-28
Supplement: Supplementary file 1 [file angeo-2019-145-supplement.pdf]

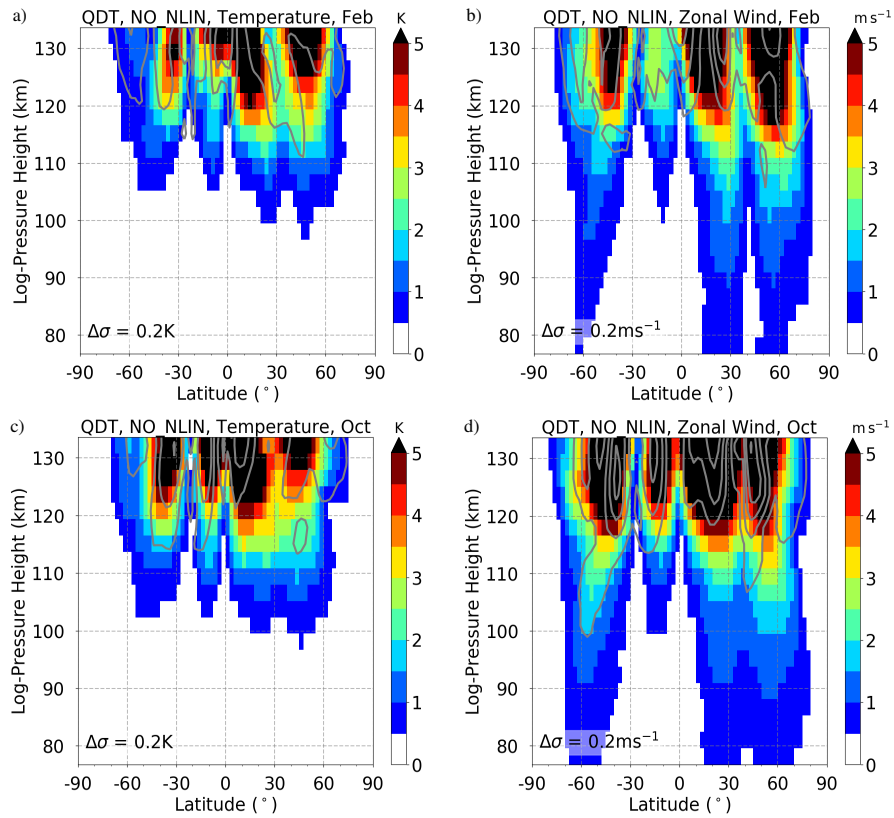

**Figure S1.** Zonal mean QDT amplitudes (colors) for the NO\_NLIN run with no nonlinear forcing mechanism enabled. (a,c) temperature, (b,d) zonal wind. (a,b) February conditions. (c,d) October conditions. Standard deviations  $\sigma$  are added as gray contour lines.

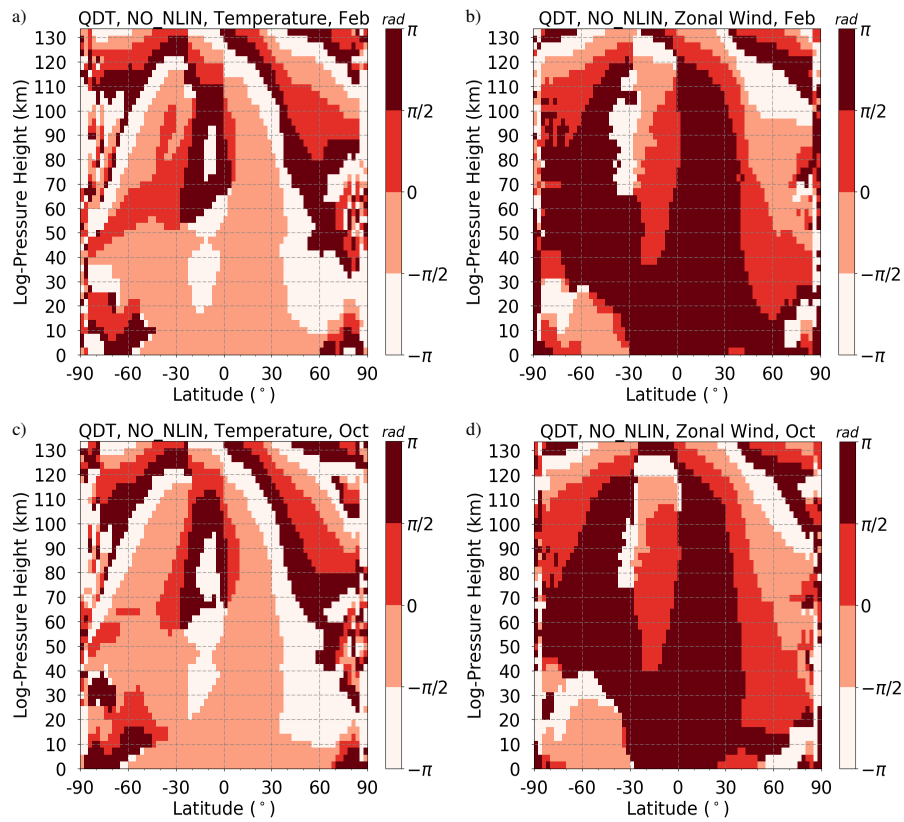

**Figure S2.** Zonal mean QDT phases for the NO\_NLIN run with no nonlinear forcing mechanism enabled. (a,c) temperature, (b,d) zonal wind. (a,b) February conditions. (c,d) October conditions.

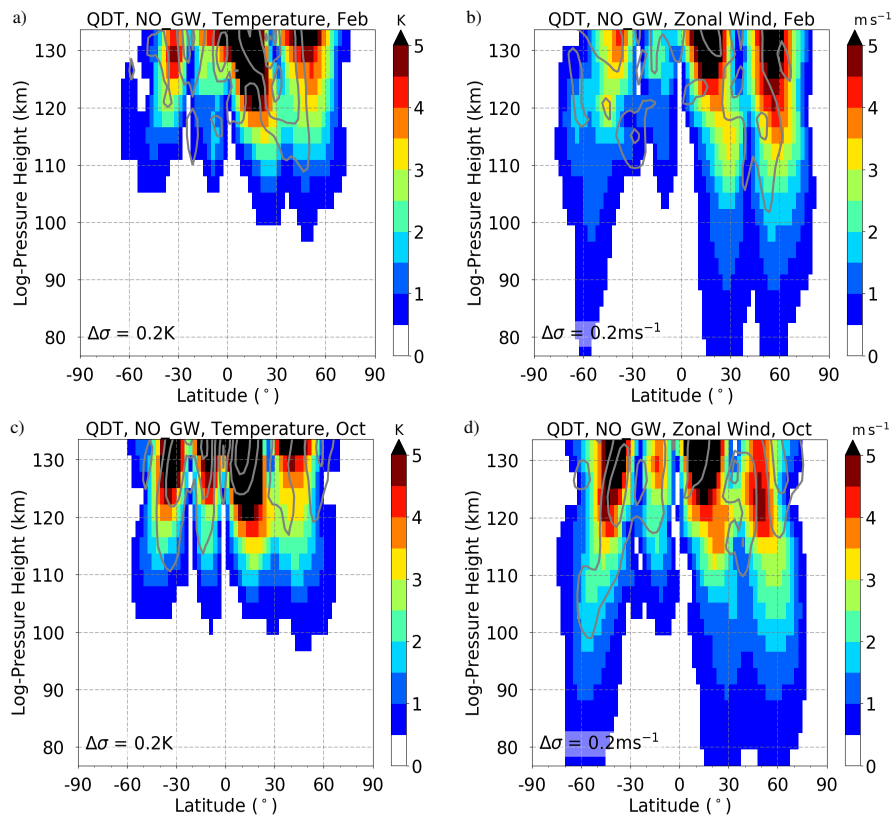

**Figure S3.** Zonal mean QDT amplitudes (colors) for the NO\_NLIN run with no nonlinear forcing mechanism enabled. (a,c) temperature, (b,d) zonal wind. (a,b) February conditions. (c,d) October conditions. Standard deviations  $\sigma$  are added as gray contour lines.

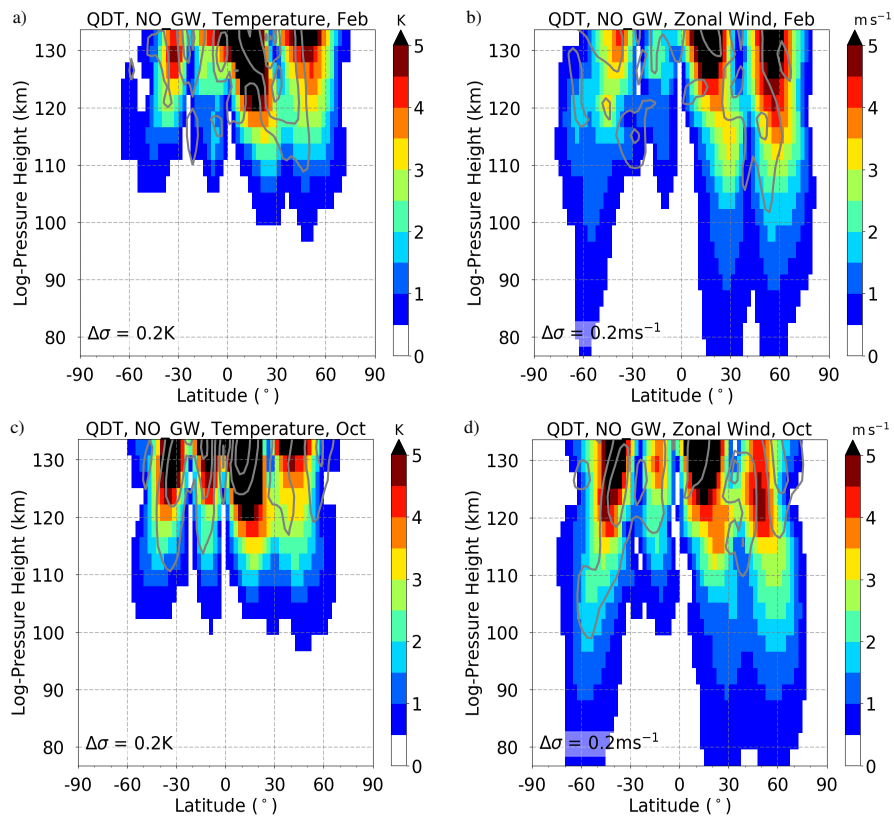

**Figure S4.** Zonal mean QDT phases for the NO\_NLIN run with no nonlinear forcing mechanism enabled. (a,c) temperature, (b,d) zonal wind. (a,b) February conditions. (c,d) October conditions.
